# Supplementary material for: Using Staged Care to Provide “Right Care First Time” to People With Common Affective Disorders
Source: Atypon-hosted journal article supplement (doi:10.1176/appi.ps.202000145), 2021-03-26
Supplement: appi.ps.202000145.ds001.pdf [file appi.ps.202000145.ds001.pdf]

Table S1. Psychosocial and developmental risk factors in stage 0 for each age group

|                                         | Child (5-11 years)                                                                                                                                                                                                                                                                                                                                                                                                                                                                                          | Youth and adults (12-54 years)                                                                                                                                                                                  | Older adult (55 years +)                                                                                                                                                                                                                                                                                                                                                                                                                                                                                                                                                                                                                                                                                                                                                                                                                          |
|-----------------------------------------|-------------------------------------------------------------------------------------------------------------------------------------------------------------------------------------------------------------------------------------------------------------------------------------------------------------------------------------------------------------------------------------------------------------------------------------------------------------------------------------------------------------|-----------------------------------------------------------------------------------------------------------------------------------------------------------------------------------------------------------------|---------------------------------------------------------------------------------------------------------------------------------------------------------------------------------------------------------------------------------------------------------------------------------------------------------------------------------------------------------------------------------------------------------------------------------------------------------------------------------------------------------------------------------------------------------------------------------------------------------------------------------------------------------------------------------------------------------------------------------------------------------------------------------------------------------------------------------------------------|
| Individual risk factors                 | Diagnosis of a neurodevelopmental condition <5 years; Perinatal injury; Temperamental risk factors; Fewer language skills; Motor skills delay; Social or learning difficulties at school transition; Poorer physical health<br>Child abuse or neglect                                                                                                                                                                                                                                                       | First-degree teenage relatives of probands; Preterm delivery or low birthweight; Childhood physical or sexual abuse; Presence of a major developmental disorder; Childhood-onset anxiety or affective disorders | Medical burden and illness, including poor self-rated health, medication use, joint complaints and osteoarthritis, increased or decreased body mass index (BMI), pain, and medical comorbidities (e.g., stroke, pulmonary diseases, etc.); Cerebrovascular risks: hypertension, hypercholesterolaemia, smoking, alcohol misuse, heart disease, diabetes, hyperhomocysteinaemia, obesity; Early-onset (<50 years old) mood disturbance (e.g. major depression, anxiety); Low educational attainment and poor cognitive stimulation; Hearing loss<br>Physical inactivity; Genetic: ApoE4 allele, MTHFR<br>Immunological/inflammatory markers: IL-6, IL-8, TNF-alpha, CRP; Sleep and Circadian: phase advance and/or persistent insomnia in affective illness courses; REM sleep behaviour disorder may be indicative of underlying synucleinopathy. |
| Family/care-giver related risk factors  | Emotional distress (e.g. depression/ anxiety) of primary caregiver; Caregiver instability/ unstable family environment; Parental conflict or relationship dissatisfaction; Style of parenting (e.g. inconsistent or harsh discipline); Loss of a parent or other grief/ illness in the family or close social network; Family history of mental ill health; Unemployment of parent who is primary earner; Material conditions (access to resources, food/nutrition, water, sanitation, housing, employment) | Family history of mental illness; Unemployment of parent who is primary earner; Material conditions (access to resources, food/nutrition, water, sanitation, housing, employment)                               | Emotional distress (e.g. depression/ anxiety) of primary care-giver; Caregiver burden; Family history of mental ill health and/or dementia; Loss of a spouse or partner; being unmarried/unpartnered; being childless; Material conditions (access to resources, food/nutrition, water, sanitation, housing, employment)                                                                                                                                                                                                                                                                                                                                                                                                                                                                                                                          |
| Other social/environmental risk factors | Financial hardship; Disadvantaged neighborhood<br>Community based participation; Violence/ crime;<br>Access to and quality of local services                                                                                                                                                                                                                                                                                                                                                                | Financial hardship; Disadvantaged neighborhood;<br>Community based participation; Violence/ crime;<br>Access to and quality of local services                                                                   | Financial hardship; Disadvantaged neighborhood;<br>Community based participation; Access to and quality of local services                                                                                                                                                                                                                                                                                                                                                                                                                                                                                                                                                                                                                                                                                                                         |
